# Supplementary material
Source: PubMed Central journal article supplement (PMC5752841)
Supplement: cr2017139x1.pdf [file cr2017139x1.pdf]

**Supplementary information, Table S1** The replication fork travelling distances during the HU treatment in different cells.

| Cell line                                | Treatment   | Gap length ( $\mu\text{m}$ ) |
|------------------------------------------|-------------|------------------------------|
| Wild-type ESC                            | 1 mM HU/4 h | 6.39                         |
| NIH3T3                                   | 1 mM HU/4 h | 4.35                         |
| C2C12                                    | 1 mM HU/4 h | 4.75                         |
| Mouse embryonic fibroblasts              | 1 mM HU/4 h | 4.56                         |
| Oct4-GFP ESC                             | 1 mM HU/4 h | 6.11                         |
| Differentiated progenies of Oct4-GFP ESC | 1 mM HU/4 h | 4.25                         |
| Wild-type ESC                            | 2 mM HU/4 h | 5.99                         |
| FK-FiliaS349A ESC                        | 2 mM HU/4 h | 4.76                         |
| <i>Filia</i> KO ESC                      | 2 mM HU/4 h | 4.88                         |
| FK-Filia ESC                             | 2 mM HU/4 h | 5.28                         |
| <i>Floped</i> KO ESC                     | 2 mM HU/4 h | 4.85                         |
| <i>Floped</i> rescue ESC                 | 2 mM HU/4 h | 5.29                         |
| <i>Filia-Floped</i> double KO ESC        | 2 mM HU/4 h | 4.68                         |
| NIH3T3-vector                            | 1 mM HU/4 h | 4.46                         |
| NIH3T3-Filia                             | 1 mM HU/4 h | 4.61                         |
| NIH3T3-Floped                            | 1 mM HU/4 h | 4.67                         |
| NIH3T3-Filia-Floped                      | 1 mM HU/4 h | 4.94                         |
| FK-FiliaS151A ESC                        | 2 mM HU/4 h | 4.88                         |
| FK-FiliaS151D ESC                        | 2 mM HU/4 h | 5.40                         |
| Blm-shRNA1-Dox ESC                       | 2 mM HU/4 h | 5.91                         |
| Blm-shRNA1+Dox ESC                       | 2 mM HU/4 h | 5.24                         |
| Blm-shRNA2-Dox ESC                       | 2 mM HU/4 h | 5.89                         |
| Blm-shRNA2+Dox ESC                       | 2 mM HU/4 h | 5.39                         |
| Trim25-shRNA1-Dox ESC                    | 2 mM HU/4 h | 5.51                         |
| Trim25-shRNA1+Dox ESC                    | 2 mM HU/4 h | 5.07                         |
| Trim25-shRNA2-Dox ESC                    | 2 mM HU/4 h | 5.47                         |
| Trim25-shRNA2+Dox ESC                    | 2 mM HU/4 h | 5.02                         |
| Trim25 rescue ESC                        | 2 mM HU/4 h | 5.62                         |
| $\Delta$ RING-Trim25 rescue ESC          | 2 mM HU/4 h | 5.10                         |
| Blm rescue ESC                           | 2 mM HU/4 h | 5.41                         |
| BlmK267R rescue ESC                      | 2 mM HU/4 h | 5.05                         |
| NIH3T3 Trim25-shRNA1-Dox                 | 1 mM HU/4 h | 4.28                         |
| NIH3T3 Trim25-shRNA1+Dox                 | 1 mM HU/4 h | 4.15                         |
| NIH3T3 Trim25 rescue                     | 1 mM HU/4 h | 4.34                         |
| NIH3T3 $\Delta$ RING-Trim25 rescue       | 1 mM HU/4 h | 4.08                         |
| NIH3T3-Filia-Floped                      | 1 mM HU/4 h | 4.88                         |
| Trim25-shRNA1-Dox                        |             |                              |
| NIH3T3-Filia-Floped                      | 1 mM HU/4 h | 4.16                         |
| Trim25-shRNA2+Dox                        |             |                              |
