# Supplementary material
Source: PubMed Central journal article supplement (PMC5752841)
Supplement: cr2017139x2.pdf [file cr2017139x2.pdf]

**Supplementary information, Table S2** Antibody information.

|                                                                               | SOURCE                    | IDENTIFIER                       |
|-------------------------------------------------------------------------------|---------------------------|----------------------------------|
| <b>Antibodies</b>                                                             |                           |                                  |
| Mouse monoclonal anti-IdU (clone B44)                                         | BD Biosciences            | Cat#347580; RRID: AB_10015219    |
| Rat monoclonal anti-BrdU (clone BU1/75), also used for immunostaining of CldU | Novus                     | Cat#NB500-169; RRID: AB_10002608 |
| Mouse monoclonal anti-Flag tag (clone 2C5)                                    | EnoGene                   | Cat#E12-001                      |
| Rabbit monoclonal anti-Myc tag                                                | EnoGene                   | Cat#E1T506                       |
| Mouse monoclonal anti-Pcna (clone PC10)                                       | Cell Signaling Technology | Cat#2586; RRID: AB_10695749      |
| Rabbit polyclonal anti-Histone H2B                                            | EnoGene                   | Cat#E1A0866                      |
| Mouse monoclonal anti-Gapdh                                                   | Sangon Biotech            | Cat#D190090                      |
| Rabbit polyclonal anti- $\gamma$ -H2ax (clone 20E3)                           | Cell Signaling Technology | Cat#9718; RRID: AB_2118009       |
| Mouse monoclonal anti-Rad51 (clone 14B4)                                      | Novus                     | Cat#NB100-148; RRID: AB_10002131 |
| Rabbit anti-p-ATR (Ser428)                                                    | Cell Signaling Technology | Cat#2853S; RRID: AB_2290281      |
| Rabbit polyclonal anti-ATR                                                    | Cell Signaling Technology | Cat#2790S; RRID: AB_2227860      |
| Mouse monoclonal anti-p-ATM(Ser1981) (clone 10H11.E12)                        | Novus                     | Cat#NB100-307; RRID: AB_10002350 |
| Rabbit monoclonal anti-ATM (clone D2E2)                                       | Cell Signaling Technology | Cat#2873S; RRID: AB_2062659      |
| Rabbit monoclonal anti-Trim25 (clone EPR7315)                                 | Abcam                     | Cat#ab167154                     |
| Rabbit polyclonal anti-Blm                                                    | Novus                     | Cat#NB100-214; RRID: AB_10001628 |
| Goat polyclonal anti-Oct4 (clone N-19)                                        | Santa Cruz                | Cat#sc-8628; RRID: AB_653551     |
| Goat polyclonal anti-Nanog (cloneW-18)                                        | Santa Cruz                | Cat#sc-30328; RRID: AB_2150376   |
| Chicken polyclonal anti-GFP                                                   | Abcam                     | Cat#ab13970; RRID: AB_300798     |
| Rabbit monoclonal anti-Cleaved Caspase-3 (Asp175) (clone 5A1E)                | Cell Signaling Technology | Cat#9664; RRID: AB_2070042       |
| Mouse monoclonal anti-Ubiquitin (clone P4D1)                                  | Santa Cruz                | Cat#sc-8017; RRID: AB_628423     |
| Rabbit monoclonal anti-K63-linkage Specific Polyubiquitin (clone D7A11)       | Cell Signaling Technology | Cat#5621; RRID: AB_10827985      |
| Goat anti-Mouse IgG (H+L) Secondary Antibody, Alexa Fluor 488                 | Thermo Fisher Scientific  | Cat#A-11029; RRID: AB_2534088    |

|                                                                 |                          |                               |
|-----------------------------------------------------------------|--------------------------|-------------------------------|
| Goat anti-Rat IgG Secondary Antibody, Alexa Fluor Cy3           | Thermo Fisher Scientific | Cat#A-10522                   |
| Donkey anti-Rabbit IgG Secondary Antibody, Alexa Fluor 594      | Thermo Fisher Scientific | Cat#R37119; RRID: AB_2556547  |
| Goat anti-Chicken IgY (H+L) Secondary Antibody, Alexa Fluor 488 | Thermo Fisher Scientific | Cat#A-11039; RRID: AB_2534096 |
| Goat anti-Rat IgG (H+L) Secondary Antibody, Alexa Fluor 647     | Thermo Fisher Scientific | Cat#A-21247; RRID: AB_2535815 |
| Goat anti-Mouse IgG (H+L) Secondary Antibody, HRP               | Thermo Fisher Scientific | Cat#31430; RRID: AB_228307    |
| Goat anti-Rabbit IgG (H+L) Secondary Antibody, HRP              | Thermo Fisher Scientific | Cat#31460; RRID: AB_228341    |
| Donkey anti-Goat IgG (H+L) Secondary Antibody, HRP              | Thermo Fisher Scientific | Cat#A16005; RRID: AB_2534679  |
