# Supplementary material
Source: PubMed Central journal article supplement (PMC5752841)
Supplement: cr2017139x3.pdf [file cr2017139x3.pdf]

**Supplementary information, Table S3** Short hairpin RNA sequences used for mRNA knockdown.

| Gene                                       | shRNA mir                                                                                                         |
|--------------------------------------------|-------------------------------------------------------------------------------------------------------------------|
| <i>Filia</i>                               | 5'-TGCTGTTGACAGTGAGCGCGGCAGCTATGTCATAGTTCAGTAGTG<br>AAGCCACAGATGTACTGAACTATGACATAGCTGCCATGCCTACTGCCT<br>CGGA-3'   |
| <i>Floped</i>                              | 5'-TGCTGTTGACAGTGAGCGCGCTGTTGGTTTGATCACATACTAGTGA<br>AGCCACAGATGTAGTATGTGATCAAACCAACAGCATGCCTACTGCCTC<br>GGA-3'   |
| #1 <i>Blm</i> shRNA<br>targeting 3'-UTR    | 5'-TGCTGTTGACAGTGAGCGATCAGAGCATCTGTAACAATTGTAGTGA<br>AGCCACAGATGTACAATTGTTACAGATGCTCTGAGTGCCTACTGCCTC<br>GGA-3'   |
| #2 <i>Blm</i> shRNA<br>targeting CDS       | 5'-TGCTGTTGACAGTGAGCGAAGACACAATCTGAAGTACTATTAGTGA<br>AGCCACAGATGTATAGTACTTCAGATTGTGTCTGTGCCTACTGCCTC<br>GGA-3'    |
| #1 <i>Trim25</i> shRNA<br>targeting 3'-UTR | 5'-TGCTGTTGACAGTGAGCGATCAGTCACTGTGGTGTGATAATAGTGA<br>AGCCACAGATGTATTATCACACCACAGTGAAGTGCCTACTGCCT<br>CGGA-3'      |
| #2 <i>Trim25</i> shRNA<br>targeting CDS    | 5'-TGCTGTTGACAGTGAGCGCAGTGTCTCTGTCAAACAAGTATAGTGA<br>AGCCACAGATGTATACTTGTGGTGGACAGAGACACTTTGCCTACTGCCTC<br>GGA-3' |
