# Supplementary material
Source: PubMed Central journal article supplement (PMC5752841)
Supplement: cr2017139x4.pdf [file cr2017139x4.pdf]

**Supplementary information, Table S4** Primers used for cDNA cloning.

| Gene                        | Primers |                                                                               |
|-----------------------------|---------|-------------------------------------------------------------------------------|
| <i>Floped</i>               | Forward | 5'-ATGGCATCCCACACGGCTG-3'                                                     |
|                             | Reverse | 5'-TTACAGGTCCTCCTCTGAGATCAGCTTCTGCATTG<br>ATGCCATAGACTCCATCTGTGTTTCTCTTCCC-3' |
| <i>Trim25</i>               | Forward | 5'-ATGGCGGAGCTGAATCCTCT-3'                                                    |
|                             | Reverse | 5'-CTATTTGGAGCAGATAGAGAGGGTG-3'                                               |
| $\Delta$ <i>RING-Trim25</i> | Forward | 5'-ATGGCGGAGCTGAATCCTCTGGCCGAGGAGCTGTC<br>CCGCAAAGTGTACCAGGTGCG-3'            |
|                             | Reverse | 5'-CTATTTGGAGCAGATAGAGAGGGTG-3'                                               |
| <i>Blm</i>                  | Forward | 5'-GCCTCGAGATGAGGATCATGGCTGCTGT-3'                                            |
|                             | Reverse | 5'-GCGCTAGCTTAGGAGAAGGCATATGAAGGC-3'                                          |
