# Supplementary material
Source: PubMed Central journal article supplement (PMC5752841)
Supplement: cr2017139x5.pdf [file cr2017139x5.pdf]

**Supplementary information, Table S5** Primers used for making FiliaS151A, FiliaS151D and BlmK267R mutation.

| Mutation   | Primers |                                       |
|------------|---------|---------------------------------------|
| FiliaS151A | Forward | 5'-CCCCTCGGCCCGCTGCCGTGAAGGTCCT-3'    |
|            | Reverse | 5'-AGGGACCTTCACGGCAGCGGGCCGAGGGG-3'   |
| FiliaS151D | Forward | 5'-CCCCTCGGCCCGCTGACGTGAAGGTCCT-3'    |
|            | Reverse | 5'-AGGGACCTTCACGTCAGCGGGCCGAGGGG-3'   |
| BlmK267R   | Forward | 5'-AAAGCCAGTCTTTGAGAGCTCACTTGGGAGC-3' |
|            | Reverse | 5'-GCTCCCAAGTGAGCTCTCAAAGACTGGCTTT-3' |
