# Supplementary material
Source: PubMed Central journal article supplement (PMC5752841)
Supplement: cr2017139x6.pdf [file cr2017139x6.pdf]

**Supplementary information, Table S6** Primers used for qPCR analysis of *Blm* and *Gapdh*.

| Gene         | Primers |                              |
|--------------|---------|------------------------------|
| <i>Blm</i>   | Forward | 5'-CTGGGGAAAGTCTTTGGTGTC-3'  |
|              | Reverse | 5'-ATTTTCCAGCTTGTCTTCGGTA-3' |
| <i>Gapdh</i> | Forward | 5'-TTGAGGTCAATGAAGGGGTC-3'   |
|              | Reverse | 5'-TCGTCCCGTAGACAAAATGG-3'   |
