# Supplementary material
Source: PubMed Central journal article supplement (PMC5752841)
Supplement: cr2017139x8.pdf [file cr2017139x8.pdf]

## Supplementary information, Figure S2

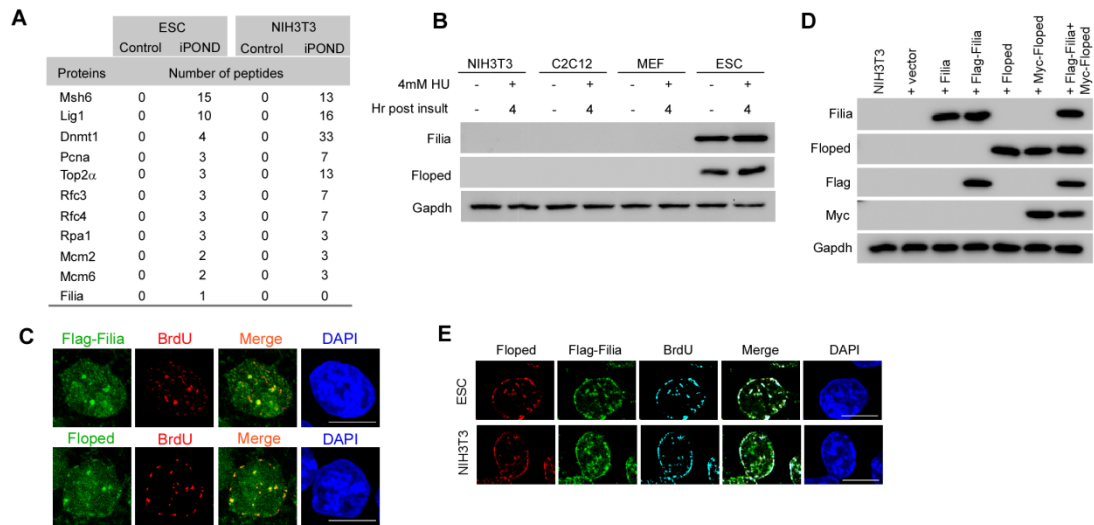

**Figure S2** Filia-Floped is a novel ESC-specific replication fork protein complex. **(A)**

Mass spectrometry analysis identified Filia as a potential replication fork protein.

Several detected proteins were shown as examples. **(B)** Filia and Floped were

specifically expressed in undifferentiated ESCs. **(C)** Immunostaining revealed the

co-localization of Flag-Filia, Floped and BrdU in ESCs. **(D)** Immunoblotting analysis

verified the establishment of NIH3T3 cells ectopically expressing Filia, Flag-Filia,

Floped, Myc-Floped, or Flag-Filia plus Myc-Floped. **(E)** Co-localization of Flag-Filia,

Floped and BrdU in ESCs and NIH3T3 cells co-expressing Flag-Filia and Floped.

Scale bar, 10  $\mu$ m.
