# Supplementary material
Source: PubMed Central journal article supplement (PMC5752841)
Supplement: cr2017139x9.pdf [file cr2017139x9.pdf]

## Supplementary information, Figure S3

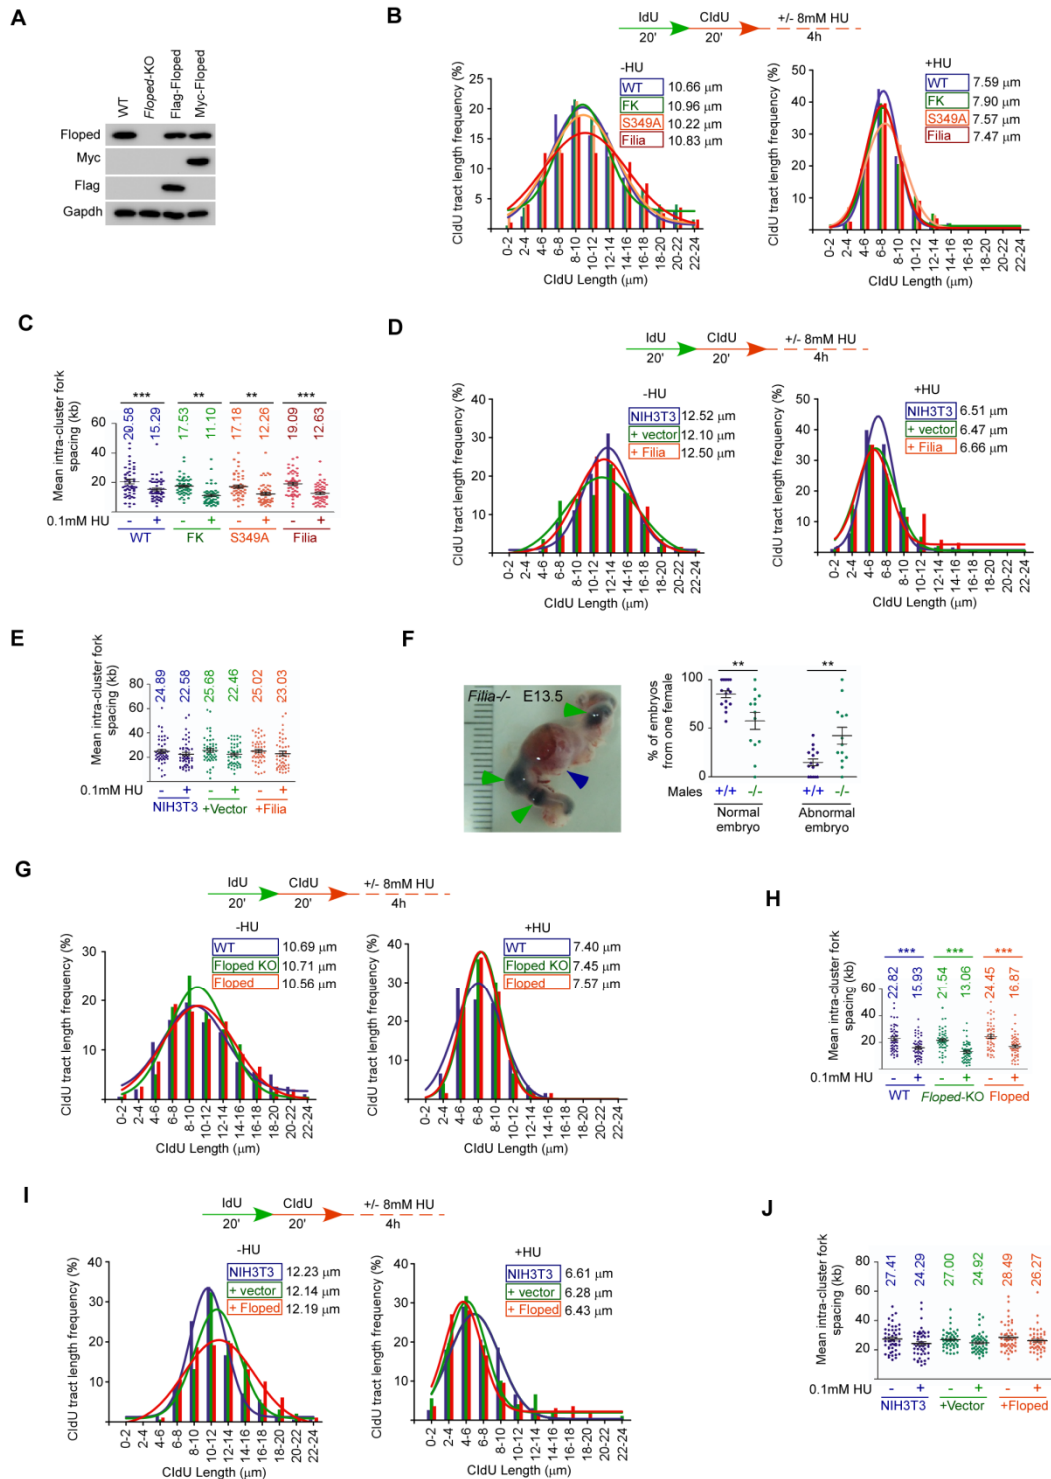

**Figure S3** *Filia* and *Floped* are not involved in nascent DNA protection or dormant replication fork firing under replication stress. (A) Immunoblotting confirmed the

establishment of Flag-Floped or Myc-Floped complemented ESCs. **(B)** Nascent DNA degradation was evaluated by CIdU tract length changes before (left panel) and after (right panel) HU treatment. *Filia* knockout (FK) or *Filia*S349A mutation had no influence on nascent DNA degradation. **(C)** Dormant replication fork firing was evaluated by mean intra-cluster fork spacing analysis in WT, FK, *Filia*S349A- and *Filia*-rescued ESCs with or without HU treatment. *Filia* did not regulate the dormant replication fork firing. More than 50 replicon clusters were analyzed. **(D)** Ectopic expression of *Filia* in NIH3T3 cells did not affect the nascent DNA stability. **(E)** Ectopic expression of *Filia* in NIH3T3 cells did not affect the dormant replication fork firing under replication stress. **(F)** 15 and 13 *Filia*<sup>-/-</sup> females were mated with wild-type (WT) or *Filia*<sup>-/-</sup> males, respectively. Depletion of *Filia* impaired the post-implantation embryonic development as examined at E13.5. Blue arrowhead indicated normal embryo and green arrowheads indicated the abnormal embryos. **(G)** Nascent DNA degradation was evaluated in WT, *Floped*-KO, and *Floped*-rescued (*Floped*) ESCs. *Floped* depletion did not affect the nascent DNA degradation. **(H)** Dormant replication fork firing was evaluated in WT, *Floped*-KO, and *Floped*-rescued ESCs. *Floped* did not influence the dormant replication fork firing under replication stress. **(I)** Ectopic expression of *Floped* in NIH3T3 cells had no effect on the nascent DNA stability. **(J)** Ectopic expression of *Floped* in NIH3T3 cells had no effect on the dormant replication fork firing under replication stress. Data are represented as mean  $\pm$  SEM. \*\**P* < 0.01, \*\*\**P* < 0.001.
