# Supplementary material
Source: PubMed Central journal article supplement (PMC5752841)
Supplement: cr2017139x10.pdf [file cr2017139x10.pdf]

## Supplementary information, Figure S4

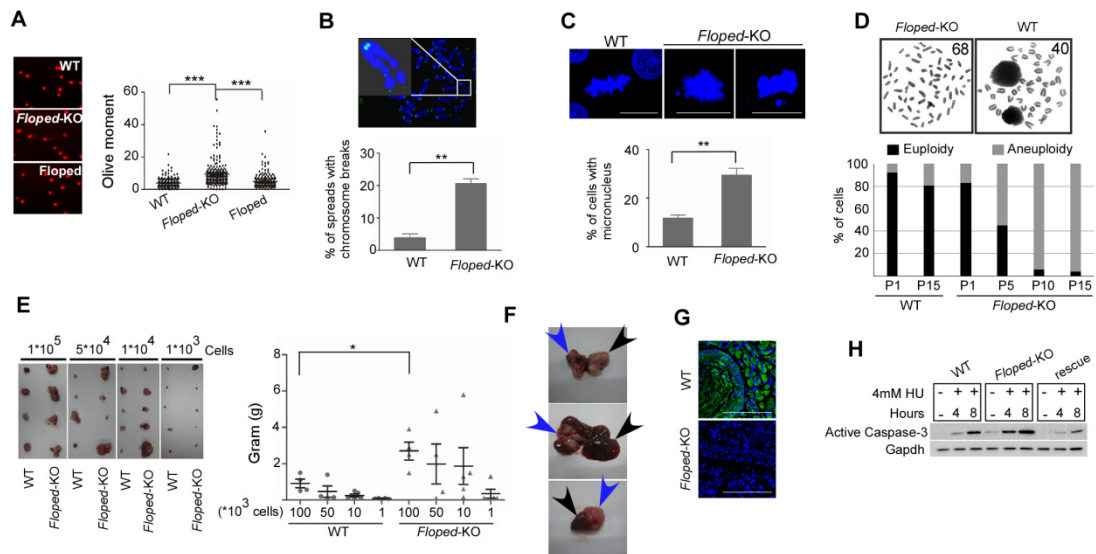

**Figure S4** Loss of Floped leads to genomic instability in mouse ESCs. **(A)** Higher level of DNA double strand breaks in *Floped*-knockout (*Floped*-KO) ESCs than in wild-type (WT) or Floped-rescued (Floped) ESCs. **(B)** *Floped*-KO ESCs had more chromosome breaks than WT ESCs. **(C)** Higher percentages of *Floped*-KO ESCs contained micronucleus. **(D)** *Floped*-KO ESCs had higher incidence of aneuploidy than WT ESCs at different passages (P). **(E)** Teratomas formed from *Floped*-KO ESCs were bigger and weighed more than those from WT ESCs injected at different concentrations. **(F)** *Floped*-KO ESCs formed tumors (blue arrowheads) in the stomach, liver and pancreas (black arrowheads). **(G)** WT ESCs were labeled with GFP. Teratomas from WT ESCs were GFP-positive, whereas tumor tissues from *Floped*-KO ESCs were GFP-negative. **(H)** *Floped*-KO ESCs were more sensitive to HU treatment than WT or Floped-rescued ESCs. Data are represented as mean  $\pm$  SEM. \* $P < 0.05$ , \*\* $P < 0.01$ , \*\*\* $P < 0.001$ . Scale bars, 10  $\mu$ m **(C)** and 100  $\mu$ m **(G)**.
